# Supplementary material for: Semi-interpenetrating polymer networks by azide–alkyne cycloaddition as novel anion exchange membranes
Source: Royal Society of Chemistry journal article supplement (doi:10.1039/c8ta02177e), 2018-01-01
Supplement: c8ta02177e1.pdf [file c8ta02177e1.pdf]

Supporting Information

**Semi-interpenetrating polymer networks by azide-alkyne cycloaddition as  
novel anion exchange membranes**

Jiandang Xue,<sup>ab</sup> Lei Liu,<sup>a\*</sup> Jiayou Liao,<sup>a</sup> Yinghua Shen,<sup>b\*</sup> and Nanwen Li<sup>a\*</sup>

<sup>a</sup> State Key Laboratory of Coal Conversion, Institute of Coal Chemistry, Chinese Academy of Sciences, Taiyuan 030001, China

<sup>b</sup> College of Chemistry and Chemical Engineering, Taiyuan University of Technology, Taiyuan 030024, China

\*Corresponding author: Lei Liu, Yinghua Shen, Nanwen Li;

E-mail address: tristingliulei@gmail.com (*L. Liu*), shenyinhua@tyut.edu.cn (*Y. Shen*),

linanwen@sxicc.ac.cn (*N. Li*)

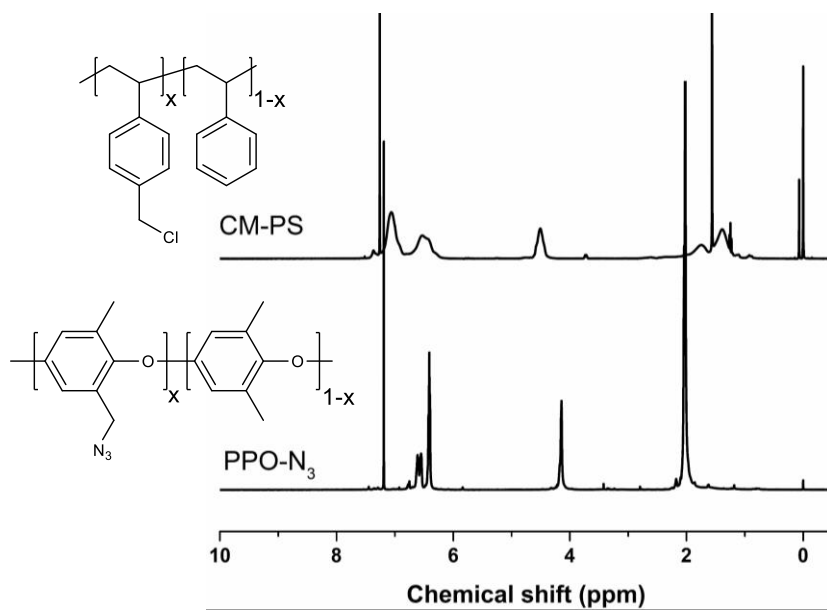

**Fig. S1**  $^1\text{H}$  NMR spectra of CM-PS copolymer and PPO- $\text{N}_3$ .

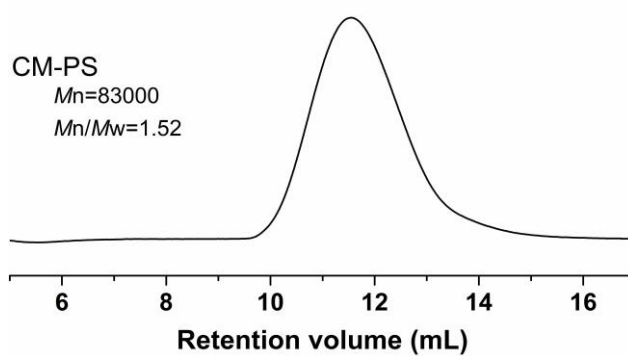

**Fig. S2** GPC curve (THF elution solvent) of CM-PS copolymer.

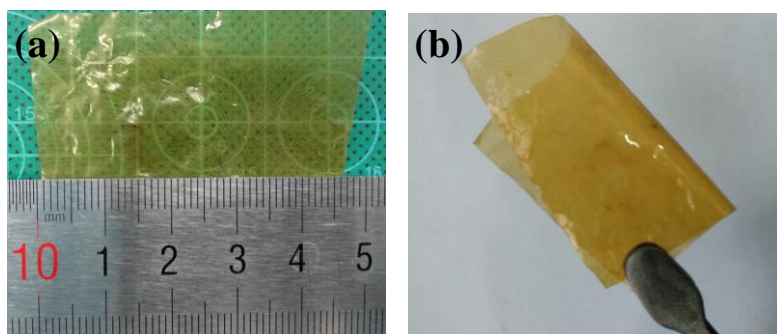

**Fig. S3** Digital photos of (a, b) semi-IPN membrane sIPN-62/30.

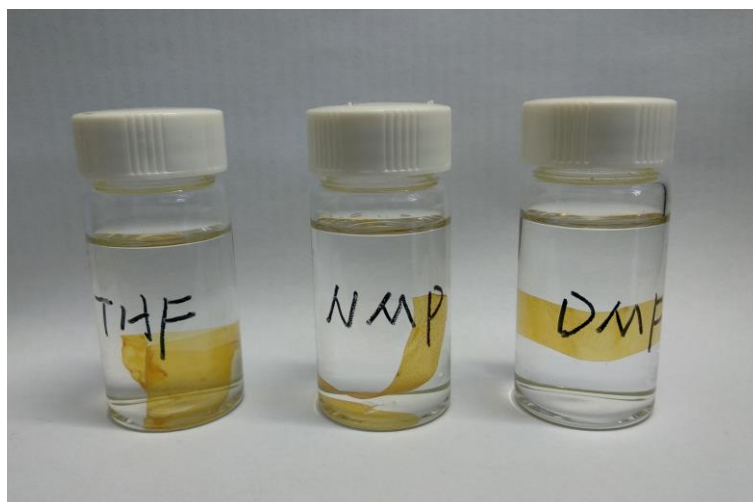

**Fig. S4** Solubility of sIPN-62/30 AEM in organic solvents (THF=tetrahydrofuran, NMP=N-methyl pyrrolidone, DMF=dimethyl formamide).

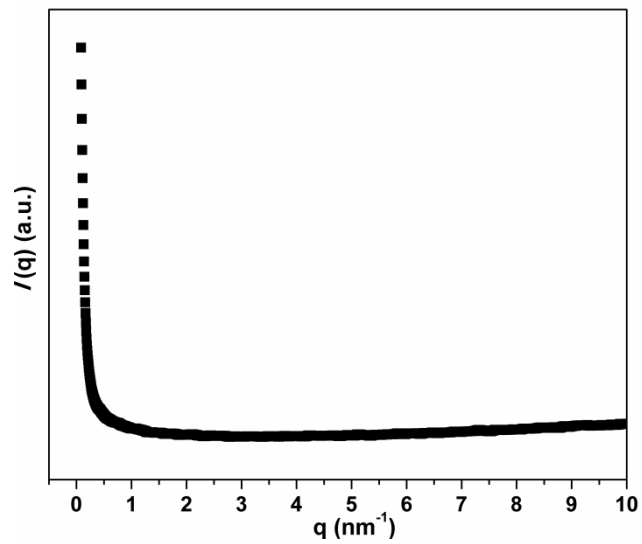

**Fig. S5** SAXS curve of sIPN-62/30 membrane

**Table S1** Properties of AEMs reported

| Sample                      | Structure    | Crosslinker               | IEC <sup>a</sup> | WU <sup>b</sup> | $\sigma(\text{OH}^-)^c$ | $\sigma'(\text{OH}^-)^d$ | Ref.         |
|-----------------------------|--------------|---------------------------|------------------|-----------------|-------------------------|--------------------------|--------------|
| PI-ran-P[VBTMA][Cl]<br>2.29 | crosslinking | EDDT <sup>e</sup>         | 1.48             | 115             | 7.1 (60 °C)             | 4.8                      | 1            |
| J20PPO                      | crosslinking | Jeffamine <sup>f</sup>    | 1.58             | 121             | 23 (20 °C)              | 14.6                     | 2            |
| c-AEM-31                    | crosslinking | PPO-N <sub>3</sub>        | 1.95             | 19.7            | 14.8 (RT)               | 7.6                      | 3            |
| IPN64                       | IPN          | TMEDA/GA <sup>g</sup>     | 1.13             | 42.6            | 8.65 (25 °C)            | 7.7                      | 4            |
| SIPN-60-2                   | semi-IPN     | dithiol <sup>h</sup>      | 1.43             | 96.5            | 29 (RT)                 | 20.3                     | 5            |
| PP-50                       | IPN          | PVBC+PVIm/GA <sup>i</sup> | 1.86             | 39.4            | 21.9 (30 °C)            | 11.8                     | 6            |
| QA sIPN-70/30               | semi-IPN     | DVB                       | 2.15             | 76.0            | 50 (25 °C)              | 23.3                     | 7            |
| sIPN-62/30                  | semi-IPN     | diyne                     | 1.44             | 68.8            | 37.2 (RT)               | 25.8                     | this<br>work |

<sup>a</sup> Experimental IEC values by titration, meq/g. <sup>b</sup> Measured at 20 °C in water, wt %. <sup>c</sup> Measured in water, mS/cm. The values in brackets indicate the temperature of conductivity tested. <sup>d</sup> IEC-normalized hydroxide conductivity, mS·g/(cm·meq). <sup>e</sup> 2,2'-(ethylenedioxy)diethanethiol. <sup>f</sup> O,O'-bis(2-aminopropyl) polypropylene glycol-block-poly(ethylene glycol)-block-polypropylene glycol 500. <sup>g</sup> N,N,N',N'-tetra-methylethylenediamine (TMEDA) and glutaraldehyde (GA, 25 wt% content in water). <sup>h</sup> 1,6-hexanedithiol. <sup>i</sup> Poly(1-vinylimidazole) (PVIm).

## References

1. S. P. Ertem, T.-H. Tsai, M. M. Donahue, W. Zhang, H. Sarode, Y. Liu, S. Seifert, A. M. Herring and E. B. Coughlin, *Macromolecules*, 2016, **49**, 153-161.
2. L. Zhu, T. J. Zimudzi, Y. Wang, X. Yu, J. Pan, J. Han, D. I. Kushner, L. Zhuang and M. A. Hickner, *Macromolecules*, 2017, **50**, 2329-2337.
3. J. Xue, L. Liu, J. Liao, Y. Shen and N. Li, *J. Membr. Sci.*, 2017, **535**, 322-330.
4. Y. Gong, X. Liao, J. Xu, D. Chen and H. Zhang, *Int. J. Hydrogen Energy*, 2016, **41**, 5816-5823.
5. J. Pan, L. Zhu, J. Han and M. A. Hickner, *Chem. Mater.*, 2015, **27**, 6689-6698.
6. D. Guo, Y. Z. Zhuo, A. N. Lai, Q. G. Zhang, A. M. Zhu and Q. L. Liu, *J. Membr. Sci.*, 2016, **518**, 295-304.
7. S. S. He, A. L. Strickler and C. W. Frank, *ChemSusChem*, 2015, **8**, 1472-1483.
